# Supplementary material for: Engineering graphene and TMDs based van der Waals heterostructures for photovoltaic and photoelectrochemical solar energy conversion
Source: Royal Society of Chemistry journal article supplement (doi:10.1039/c8cs00067k), 2018-01-01
Supplement: c8cs00067k1.pdf [file c8cs00067k1.pdf]

**Electronic Supplementary Information**

***Engineering graphene and TMDs based van der Waals heterostructures for photovoltaic and photoelectrochemical solar energy conversion***

Changli Li<sup>a</sup>, Qi Cao<sup>b</sup>, Faze Wang<sup>c</sup>, Yequan Xiao<sup>c</sup>, Yanbo Li<sup>c</sup>, Jean-Jacques Delaunay<sup>\*b</sup>, Hongwei Zhu<sup>\*a</sup>

<sup>a</sup>State Key Laboratory of New Ceramics and Fine Processing, School of Materials Science and Engineering, Tsinghua University, Beijing 100084, China

<sup>b</sup>School of Engineering, The University of Tokyo, 7-3-1 Hongo, Bunkyo-ku, Tokyo 113-8656, Japan

<sup>c</sup>Institute of Fundamental and Frontier Sciences, University of Electronic Science and Technology of China, Chengdu, China

**Table S1.** Selected representative reports of graphene and TMDs based 2D/3D and 2D/2D heterostructure photoelectrodes in PEC cells.

| Heterojunction type                                      | Device structure                                                                                                 | Photocurrent (mA/cm <sup>2</sup> ); applied bias    | Onset potential (V vs. RHE)      | Stability ( $J/J_0$ ); time; applied bias (V vs. RHE)                         | Electrolyte; light source                                                                                                                            | Ref. |
|----------------------------------------------------------|------------------------------------------------------------------------------------------------------------------|-----------------------------------------------------|----------------------------------|-------------------------------------------------------------------------------|------------------------------------------------------------------------------------------------------------------------------------------------------|------|
| Graphene/semi conductors                                 | F-doped graphene/ <i>n</i> -Si photoanode                                                                        | 10; 0 V vs. E(A/A <sup>-</sup> )                    | -0.27 V vs. E(A/A <sup>-</sup> ) | ~100%; ~28 h; 0 V vs. E(A/A <sup>-</sup> )                                    | 50 mM Fe(CN) <sub>6</sub> <sup>3-</sup> and 350 mM Fe(CN) <sub>6</sub> <sup>4-</sup> solution; W-halogen lamp illumination (~33 mW/cm <sup>2</sup> ) | 320  |
|                                                          | N-doped monolayer graphene/ <i>p</i> -Si NW photocathode                                                         | -27; 0 V vs. RHE                                    | 0.35                             | ~30%; ~2.8 h; 0                                                               | 1 M HClO <sub>4</sub> solution (pH = 0); AM 1.5G (100 mW/cm <sup>2</sup> )                                                                           | 321  |
|                                                          | N-doped graphene quantum sheets/ <i>p</i> -Si NW photocathode                                                    | -35; 0 V vs. RHE                                    | 0.26                             | -                                                                             | 1 M HClO <sub>4</sub> solution (pH = 0); AM 1.5G (100 mW/cm <sup>2</sup> )                                                                           | 322  |
|                                                          | FeNiCoO <sub>x</sub> /graphene micro-net/ <i>n</i> -Si photoanode                                                | 19; 1.5 V vs. RHE                                   | 1.0                              | ~71%; 1 h; 1.5                                                                | 1 M NaOH solution (pH = 14); AM 1.5G (100 mW/cm <sup>2</sup> )                                                                                       | 325  |
|                                                          | Graphene/Cu <sub>2</sub> O photocathode                                                                          | -4.8; 0 V vs. RHE                                   | 0.6                              | ~83.3%; 20 min; 0                                                             | Na <sub>2</sub> SO <sub>4</sub> with 1.0 M buffer solution (pH = 5); AM 1.5G (100 mW/cm <sup>2</sup> )                                               | 326  |
|                                                          | BiV <sub>1-x</sub> Mo <sub>x</sub> O <sub>4</sub> /graphene/ $\alpha$ -Fe <sub>2</sub> O <sub>3</sub> photoanode | 1.97; 1.6 V vs. RHE                                 | 0.27                             | ~100%; 12 h; 1.2                                                              | 0.01 M Na <sub>2</sub> SO <sub>4</sub> solution; AM 1.5G (100 mW/cm <sup>2</sup> )                                                                   | 332  |
|                                                          | NiFe-LDH/graphene/TiO <sub>2</sub> photoanode                                                                    | 1.74; 1.25 V vs. SCE                                | 0.35                             | ~100%; 5 h; 0.6 V vs. SCE                                                     | 0.5 M Na <sub>2</sub> SO <sub>4</sub> solution (pH = 6.8); Xe lamp (100 mW/cm <sup>2</sup> )                                                         | 334  |
|                                                          | MoS <sub>2</sub> /N-graphene/g-C <sub>3</sub> N <sub>4</sub> photoanode                                          | 27.76 $\mu$ A cm <sup>-2</sup> at 0.8 V vs. Ag/AgCl | -                                | ~100%; ~24 min; 0 V vs. Ag/AgCl                                               | 0.01 M Na <sub>2</sub> SO <sub>4</sub> solution (pH = 7); AM 1.5G (100 mW/cm <sup>2</sup> )                                                          | 336  |
|                                                          | <i>p</i> -Cu <sub>2</sub> O/graphene photocathode (CO <sub>2</sub> reduction)                                    | -0.75; 0.05 V vs. Ag/AgCl                           | -                                | ~100%; 6 h; -0.05 and +0.05 V vs. Ag/AgCl                                     | Phosphate buffer solution (pH = 4.0); AM 1.5G with a UV-cutoff filter                                                                                | 344  |
| FTO/f-RGO/rr-P3HT:PCBM/TiO <sub>2</sub> /Pt photocathode | -6.01; 0 V vs. RHE                                                                                               | 0.6                                                 | ~57%; 20 h; 0                    | Sodium acetate/acetic acid buffer (pH = 4); AM 1.5G (100 mW/cm <sup>2</sup> ) | 345                                                                                                                                                  |      |
| TMDs/semiconductors                                      | Mo <sub>3</sub> S <sub>4</sub> / <i>p</i> -Si pillars photocathode                                               | -8; 0 V vs. RHE                                     | 0.15                             | ~100%; 1 h; 0                                                                 | 1 M HClO <sub>4</sub> (pH = 0); AM 1.5G (>620 nm, 28.3 mW/cm <sup>2</sup> )                                                                          | 347  |

|                                                                                                           |                    |       |                      |                                                                                                                                     |     |
|-----------------------------------------------------------------------------------------------------------|--------------------|-------|----------------------|-------------------------------------------------------------------------------------------------------------------------------------|-----|
| MoS <sub>3</sub> /p-InP pillars photocathode                                                              | -21; 0 V vs. RHE   | 0.6   | ~100%; 1 h; 0        | 1 M HClO <sub>4</sub> ; AM 1.5G (100 mW/cm <sup>2</sup> )                                                                           | 348 |
| MoS <sub>x</sub> /p-GaP photocathode                                                                      | -6.4; 0 V vs. RHE  | 0.71  | ~100%; 5 h; 0        | 1 M HClO <sub>4</sub> (pH = 0); AM 1.5G (100 mW/cm <sup>2</sup> )                                                                   | 349 |
| MoS <sub>2</sub> /p-Si NW photocathode                                                                    | -1; 0 V vs. RHE    | 0.25  | ~100%; 1 h; -0.1     | Na <sub>2</sub> SO <sub>4</sub> with 1.0 M buffer solution (pH = 5); Xe lamp with a 420 nm cut-off filter (100 mW/cm <sup>2</sup> ) | 350 |
| MoS <sub>x</sub> /Ti/n <sup>+</sup> p-Si photocathode                                                     | -16; 0 V vs. RHE   | 0.33  | ~100%; 1 h; 0.2      | 1 M HClO <sub>4</sub> ; AM 1.5 G (>635 nm, 38.6 mW/cm <sup>2</sup> )                                                                | 351 |
| MoS <sub>2</sub> /TiO <sub>2</sub> /Si photocathode                                                       | -15; 0 V vs. RHE   | 0.30  | ~100%; 1.25 h; -0.33 | 0.5 M H <sub>2</sub> SO <sub>4</sub> (pH = 0.48); AM 1.5G (100 mW/cm <sup>2</sup> )                                                 | 353 |
| MoS <sub>2</sub> /Al <sub>2</sub> O <sub>3</sub> /n <sup>+</sup> p Si photocathode                        | -32; 0 V vs. RHE   | 0.4   | ~100%; 120 h; 0      | 1 M HClO <sub>4</sub> (pH = 0); AM 1.5G (100 mW/cm <sup>2</sup> )                                                                   | 355 |
| MoS <sub>x</sub> /MoS <sub>2</sub> /Mo/n <sup>+</sup> p-Si photocathode                                   | -12; 0 V vs. RHE   | 0.334 | ~100%; 120 h; 0      | 1 M HClO <sub>4</sub> ; AM 1.5 G (>635 nm, 39.5 mW/cm <sup>2</sup> )                                                                | 356 |
| Mo <sub>3</sub> S <sub>13</sub> /MoS <sub>2</sub> /Mo/Mo <sub>x</sub> Si/n <sup>+</sup> p-Si photocathode | -17.5; 0 V vs. RHE | 0.40  | ~100%; 100 h; 0      | 0.5 M H <sub>2</sub> SO <sub>4</sub> ; AM 1.5G (100 mW/cm <sup>2</sup> )                                                            | 357 |
| MoS <sub>2</sub> /MoO <sub>x</sub> /SiO <sub>2</sub> /MoSi <sub>x</sub> /Si photocathode                  | -18.5; 0 V vs. RHE | 0.31  | ~100%; 1538 h; 0     | 0.5 M H <sub>2</sub> SO <sub>4</sub> ; AM 1.5G (100 mW/cm <sup>2</sup> )                                                            | 358 |
| MoS <sub>2</sub> /Mo/GaInP <sub>2</sub> photocathode                                                      | -6; 0 V vs. RHE    | 0.36  | ~100%; 70 h; -0.025  | 3 M H <sub>2</sub> SO <sub>4</sub> ; AM 1.5G (100 mW/cm <sup>2</sup> )                                                              | 359 |
| MoS <sub>2</sub> /p-Si photocathode                                                                       | -21.4; 0 V vs. RHE | 0.23  | ~100%; 24 h; -0.29   | 0.5 M H <sub>2</sub> SO <sub>4</sub> (pH = 0.3); AM 1.5G (100 mW/cm <sup>2</sup> )                                                  | 361 |
| MoS <sub>2</sub> (13 nm)/p-Si photocathode                                                                | -24.6; 0 V vs. RHE | 0.17  | ~100%; 50 h; 0       | 0.5 M H <sub>2</sub> SO <sub>4</sub> (pH = 1.1); AM 1.5G (100 mW/cm <sup>2</sup> )                                                  | 362 |
| WS <sub>2</sub> (23 nm)/p-Si photocathode                                                                 | -8.3; 0 V vs. RHE  | 0.2   | ~83%; 10 h; 0        | 0.5 M H <sub>2</sub> SO <sub>4</sub> (pH = 0.27); AM 1.5G (100 mW/cm <sup>2</sup> )                                                 | 364 |
| 1T-MoS <sub>2</sub> /p-Si photocathode                                                                    | -17.6; 0 V vs. RHE | 0.25  | ~77%; 3 h; 0         | 0.5 M H <sub>2</sub> SO <sub>4</sub> ; AM 1.5G (100 mW/cm <sup>2</sup> )                                                            | 366 |
| MoS <sub>x</sub> Cl <sub>y</sub> /p-Si photocathode                                                       | -20.6; 0 V vs. RHE | 0.27  | -                    | 0.5 M H <sub>2</sub> SO <sub>4</sub> (pH = 0.16); AM 1.5G (100 mW/cm <sup>2</sup> )                                                 | 367 |
| MoS <sub>x</sub> Cl <sub>y</sub> /p-Si micro-pyramids photocathode                                        | -43.0; 0 V vs. RHE | 0.41  | ~100%; 2 h; 0        | 0.5 M H <sub>2</sub> SO <sub>4</sub> ; AM 1.5G (100 mW/cm <sup>2</sup> )                                                            | 368 |

|                                       |                                                                               |                            |                     |                                              |                                                                                                                         |     |
|---------------------------------------|-------------------------------------------------------------------------------|----------------------------|---------------------|----------------------------------------------|-------------------------------------------------------------------------------------------------------------------------|-----|
|                                       | MoSe <sub>x</sub> Cl <sub>y</sub> /p-Si micro-pyramids photocathode           | -38.8; 0 V vs. RHE         | 0.35                | ~100%; 2 h; 0                                | 0.5 M H <sub>2</sub> SO <sub>4</sub> ; AM 1.5G (100 mW/cm <sup>2</sup> )                                                | 368 |
|                                       | a-CoMoS <sub>x</sub> /Si photocathode                                         | -17.5; 0 V vs. RHE         | 0.25                | ~93%; ~3.2 h; 0                              | Phosphate electrolyte (pH = 4.25); AM 1.5G (100 mW/cm <sup>2</sup> )                                                    | 370 |
|                                       | CoMoS <sub>x</sub> /p-Si microwire photocathode                               | -17.2; 0 V vs. RHE         | 0.192               | ~67%; 8 h; 0                                 | 0.5 M H <sub>2</sub> SO <sub>4</sub> (pH = 0.3); AM 1.5G (100 mW/cm <sup>2</sup> )                                      | 371 |
|                                       | MoO <sub>x</sub> S <sub>y</sub> /p-Si microwire photocathode                  | -9.83; 0 V vs. RHE         | 0.24                | ~100%; 2 h; 0                                | 0.5 M K <sub>2</sub> SO <sub>4</sub> solution (pH = 1); AM 1.5G (IR filtered; 60 mW/cm <sup>2</sup> )                   | 372 |
|                                       | S:MoP/p-Si photocathode                                                       | -33.1; 0 V vs. RHE         | 0.28                | ~80%; 2.8 h; 0                               | 0.5 M H <sub>2</sub> SO <sub>4</sub> (pH = 1.1); AM 1.5G (100 mW/cm <sup>2</sup> )                                      | 373 |
|                                       | MoS <sub>2-x</sub> /TiO <sub>2</sub> /AZO/p-Cu <sub>2</sub> O photocathode    | -5.7; 0 V vs. RHE          | 0.45                | ~100%; 5 h at pH = 1, 10 h at pH = 4 or 9; 0 | 0.5 M Na <sub>2</sub> SO <sub>4</sub> with 0.2 M potassium hydrogen phthalate buffer; AM 1.5G (100 mW/cm <sup>2</sup> ) | 316 |
| <b>Ultrathin TMDs photoelectrodes</b> | WSe <sub>2</sub> nanoflake photocathode (~25 nm)                              | -1.0; 0 V vs. RHE          | 0.5                 | ~100%; 27 min; 0                             | 1 M H <sub>2</sub> SO <sub>4</sub> solution (pH = 0); AM 1.5G (100 mW/cm <sup>2</sup> )                                 | 423 |
|                                       | Edge-passivated WSe <sub>2</sub> nanoflake photocathode (~18 nm)              | -2.64; -0.37 V vs. Ag/AgCl | -0.2 V vs. Ag/AgCl  | -                                            | Chloranil in MeCN; AM 1.5G (100 mW/cm <sup>2</sup> )                                                                    | 424 |
|                                       | Pre-annealed, HTS-passivated WSe <sub>2</sub> nanoflake photocathode (~11 nm) | ~-4; 0 V vs. RHE           | 0.4                 | ~100%; > 2 h; 0                              | 1 M H <sub>2</sub> SO <sub>4</sub> solution (pH = 0); AM 1.5G (100 mW/cm <sup>2</sup> )                                 | 448 |
|                                       | MoS <sub>2</sub> /perylene-diimide (PDI) photoanode (~10 nm)                  | ~2.60; 0.1 V vs. Ag/AgCl   | -0.3 V vs. Ag/AgCl  | ~100%; 300 s; 0.1 V vs. Ag/AgCl              | 25 mM Lil in 0.1 M TBAP acetonitrile solution; AM 1.5G (100 mW/cm <sup>2</sup> )                                        | 426 |
|                                       | MoS <sub>2</sub> /WS <sub>2</sub> photoanode (~60 nm)                         | 0.45; 1.23 V vs. RHE       | 0.6                 | ~100%; 1 h; 1                                | 0.5 M NaClO <sub>4</sub> solution (pH = 1); AM 1.5G (100 mW/cm <sup>2</sup> )                                           | 427 |
|                                       | ZnIn <sub>2</sub> S <sub>4</sub> /MoSe <sub>2</sub> photoanode                | -6.8; -0.8 V vs. SCE       | -0.35 V vs. SCE     | ~87%; ~280 s; -                              | 0.2 M Na <sub>2</sub> SO <sub>4</sub> (pH = 6.8; Xe lamp (λ>400 nm)                                                     | 417 |
|                                       | Black phosphorus/WS <sub>2</sub> photocathode                                 | -2.25; -1 V vs. Ag/AgCl    | -0.61 V vs. Ag/AgCl | ~91%; ~240 s; 0.3 V vs. Ag/AgCl              | 0.1 M NaOH ethanol solution; Xe lamp (>780 nm irradiation)                                                              | 461 |
